# Supplementary material for: Clinical and MRI responses to etanercept in early non-radiographic axial spondyloarthritis: 48-week results from the EMBARK study
Source: PubMed Central journal article supplement — Ann Rheum Dis. 2015 Aug 12;75(7):1328–35. doi: 10.1136/annrheumdis-2015-207596 (PMC4941178; doi:10.1136/annrheumdis-2015-207596), 2015-08-12
Supplement: annrheumdis-2015-207596-s1.pdf [file annrheumdis-2015-207596-s1.pdf]

**Online Supplementary Figure S1.** Mean values for **(A)** SPARCC MRI SIJ score, **(B)** SPARCC MRI spinal score, and **(C)** ASspiMRI-a Total score.

A.

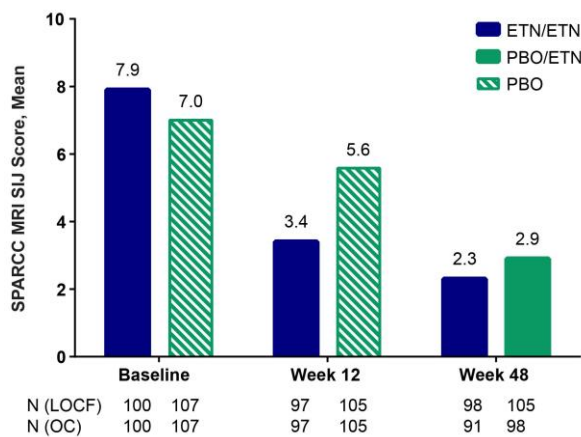

B.

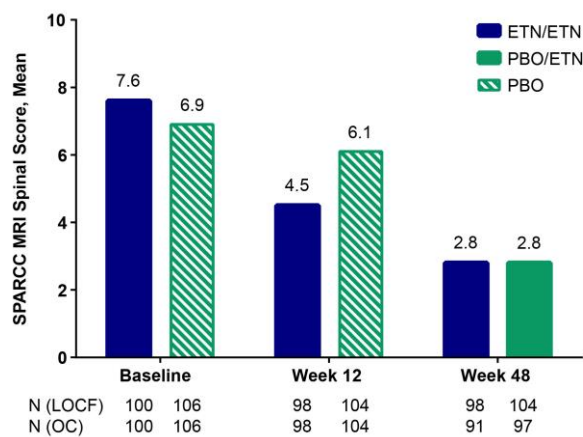

C.

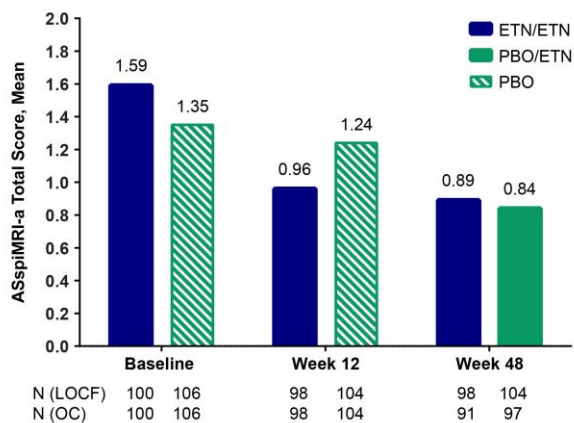

Population is mITT, LOCF within each study period. Actual number of patients, observed case (OC), is also shown.
