# Supplementary material for: Clinical and MRI responses to etanercept in early non-radiographic axial spondyloarthritis: 48-week results from the EMBARK study
Source: PubMed Central journal article supplement — Ann Rheum Dis. 2015 Aug 12;75(7):1328–35. doi: 10.1136/annrheumdis-2015-207596 (PMC4941178; doi:10.1136/annrheumdis-2015-207596), 2015-08-12
Supplement: annrheumdis-2015-207596-s2.pdf [file annrheumdis-2015-207596-s2.pdf]

**Online Supplementary Table S1.** Mean (SD) clinical efficacy and patient-reported outcomes

|                      |         | Double-blind phase |             | Open-label phase |             |             |             |  |
|----------------------|---------|--------------------|-------------|------------------|-------------|-------------|-------------|--|
|                      |         | Wk 12              | Wk 16       | Wk 24            | Wk 32       | Wk 40       | Wk 48       |  |
| N=Pts in study       | ETN/ETN | N=101              | N=99        | N=98             | N=94        | N=93        | N=91        |  |
|                      | PBO/ETN | N=106              | N=104       | N=103            | N=100       | N=99        | N=99        |  |
| ASDAS-CRP            | ETN/ETN | 1.7 (0.9)          | 1.6 (0.9)   | 1.5 (0.9)        | 1.6 (0.9)   | 1.4 (0.9)   | 1.4 (1.0)   |  |
|                      | PBO/ETN | 2.3 (1.1)          | 1.6 (0.9)   | 1.4 (0.9)        | 1.4 (0.9)   | 1.4 (0.9)   | 1.3 (0.9)   |  |
| BASDAI               | ETN/ETN | 3.6 (2.4)          | 3.3 (2.2)   | 3.1 (2.3)        | 3.2 (2.3)   | 2.7 (2.2)   | 2.8 (2.2)   |  |
|                      | PBO/ETN | 4.3 (2.2)          | 3.0 (2.2)   | 2.7 (2.1)        | 2.7 (2.1)   | 2.6 (2.1)   | 2.5 (2.1)   |  |
| BASFI                | ETN/ETN | 2.6 (2.3)          | 2.5 (2.3)   | 2.4 (2.3)        | 2.4 (2.4)   | 2.1 (2.1)   | 2.1 (2.0)   |  |
|                      | PBO/ETN | 3.0 (2.4)          | 2.1 (2.0)   | 2.0 (1.9)        | 1.8 (1.9)   | 1.7 (1.8)   | 1.7 (1.8)   |  |
| BASMI                | ETN/ETN | 1.0 (1.3)          | 0.9 (1.3)   | 0.9 (1.1)        | 0.8 (1.0)   | 0.9 (1.0)   | 0.8 (1.1)   |  |
|                      | PBO/ETN | 1.0 (1.2)          | 0.8 (1.1)   | 0.8 (1.2)        | 0.7 (1.1)   | 0.7 (1.0)   | 0.7 (1.1)   |  |
| Total back pain      | ETN/ETN | 3.2 (2.6)          | 2.8 (2.5)   | 2.8 (2.5)        | 2.9 (2.5)   | 2.2 (2.3)   | 2.4 (2.5)   |  |
|                      | PBO/ETN | 4.1 (2.6)          | 2.8 (2.5)   | 2.5 (2.5)        | 2.6 (2.5)   | 2.2 (2.4)   | 2.3 (2.2)   |  |
| SF-36 PCS            | ETN/ETN | 43.7 (8.9)         | na          | 44.4 (9.2)       | na          | na          | 45.8 (9.3)  |  |
|                      | PBO/ETN | 41.0 (7.8)         | na          | 44.6 (8.9)       | na          | na          | 45.9 (7.9)  |  |
| SF-36 MCS            | ETN/ETN | 45.8 (10.7)        | na          | 46.0 (12.2)      | na          | na          | 46.7 (10.7) |  |
|                      | PBO/ETN | 45.7 (11.2)        | na          | 48.3 (9.1)       | na          | na          | 47.3 (11.1) |  |
| EQ-5D Utility Score  | ETN/ETN | 0.70 (0.26)        | 0.71 (0.27) | 0.74 (0.23)      | na          | 0.77 (0.26) | 0.76 (0.23) |  |
|                      | PBO/ETN | 0.67 (0.27)        | 0.75 (0.24) | 0.78 (0.19)      | na          | 0.76 (0.23) | 0.80 (0.15) |  |
| N=Pts with Work Data | ETN/ETN | N=48               | N=49        | N=45             | N=46        | N=45        | N=45        |  |
|                      | PBO/ETN | N=50               | N=46        | N=43             | N=43        | N=47        | N=45        |  |
| WPAI Overall         | ETN/ETN | 26.7 (25.1)        | 27.1 (23.2) | 26.3 (28.0)      | 26.3 (23.9) | 18.4 (18.8) | 20.6 (19.6) |  |
|                      | PBO/ETN | 34.4 (27.1)        | 23.4 (21.8) | 26.1 (25.3)      | 27.0 (24.0) | 21.4 (19.5) | 23.6 (23.3) |  |

Analyses performed on mITT, LOCF population for ASDAS-CRP, BASDAI, BASFI, BASMI, total back pain; mITT, observed case population for SF-36 PCS, SF-36 MCS, EQ-5D utility score, WPAI Overall.

ASDAS-CRP, Ankylosing Spondylitis Disease Activity Score based C-reactive protein; BASDAI, Bath Ankylosing Spondylitis Disease Activity Index; BASFI, Bath Ankylosing Spondylitis Functional Index; BASMI, Bath Ankylosing Spondylitis Metrology Index; EQ-5D, EuroQoL 5 Dimensions; ETN, etanercept; LOCF, last observation carried forward; MCS, mental component summary; mITT, modified intention-to-treat; na, not available, ns, non-significant; PCS, physical component summary; PBO, placebo; pts, patients; SEM, standard error of the mean; SF-36, 36-item Short Form Health Survey; wk, week; WPAI, Work Productivity and Activity Impairment Questionnaire.
