# Supplementary material for: Clinical and MRI responses to etanercept in early non-radiographic axial spondyloarthritis: 48-week results from the EMBARK study
Source: PubMed Central journal article supplement — Ann Rheum Dis. 2015 Aug 12;75(7):1328–35. doi: 10.1136/annrheumdis-2015-207596 (PMC4941178; doi:10.1136/annrheumdis-2015-207596), 2015-08-12
Supplement: annrheumdis-2015-207596-s3.pdf [file annrheumdis-2015-207596-s3.pdf]

**Online Supplementary Table S2.** Correlation between change from baseline in SPARCC spinal score and change in clinical measures, ETN/ETN group

|                 |                  | $\Delta$ SPARCC spine 6-DVU |       |
|-----------------|------------------|-----------------------------|-------|
|                 |                  | N                           | R     |
| ASDAS           | Week 12 $\Delta$ | 95                          | 0.16  |
|                 | Week 48 $\Delta$ | 88                          | 0.27* |
| BASDAI          | Week 12 $\Delta$ | 98                          | 0.16  |
|                 | Week 48 $\Delta$ | 90                          | 0.17  |
| BASMI           | Week 12 $\Delta$ | 95                          | 0.05  |
|                 | Week 48 $\Delta$ | 88                          | 0.03  |
| BASFI           | Week 12 $\Delta$ | 98                          | 0.20* |
|                 | Week 48 $\Delta$ | 90                          | 0.15  |
| Total back pain | Week 12 $\Delta$ | 98                          | 0.18  |
|                 | Week 48 $\Delta$ | 90                          | 0.20  |
| CRP             | Week 12 $\Delta$ | 97                          | 0.10  |
|                 | Week 48 $\Delta$ | 89                          | 0.21* |
| ASAS40          | Week 12 $\Delta$ | 98                          | -0.14 |
|                 | Week 48 $\Delta$ | 90                          | -0.07 |

Observed case population.

There were no significant correlations in the PBO/ETN group.

\* $p < 0.05$ .

ASAS40, Assessment of SpondyloArthritis international Society 40; ASDAS, Ankylosing Spondylitis Disease Activity Score; BASDAI, Bath Ankylosing Spondylitis Disease Activity Index; BASFI, Bath Ankylosing Spondylitis Functional Index; BASMI, Bath Ankylosing Spondylitis Metrology Index; CRP, C-reactive protein; 6-DVU, 6-discvertebral units; ETN, etanercept; R, Spearman Correlation; SPARCC, Spondyloarthritis Research Consortium of Canada.
